# Supplementary material
Source: HighWire-hosted journal article supplement (https://srh.bmj.com/content/47/3/e1.1)

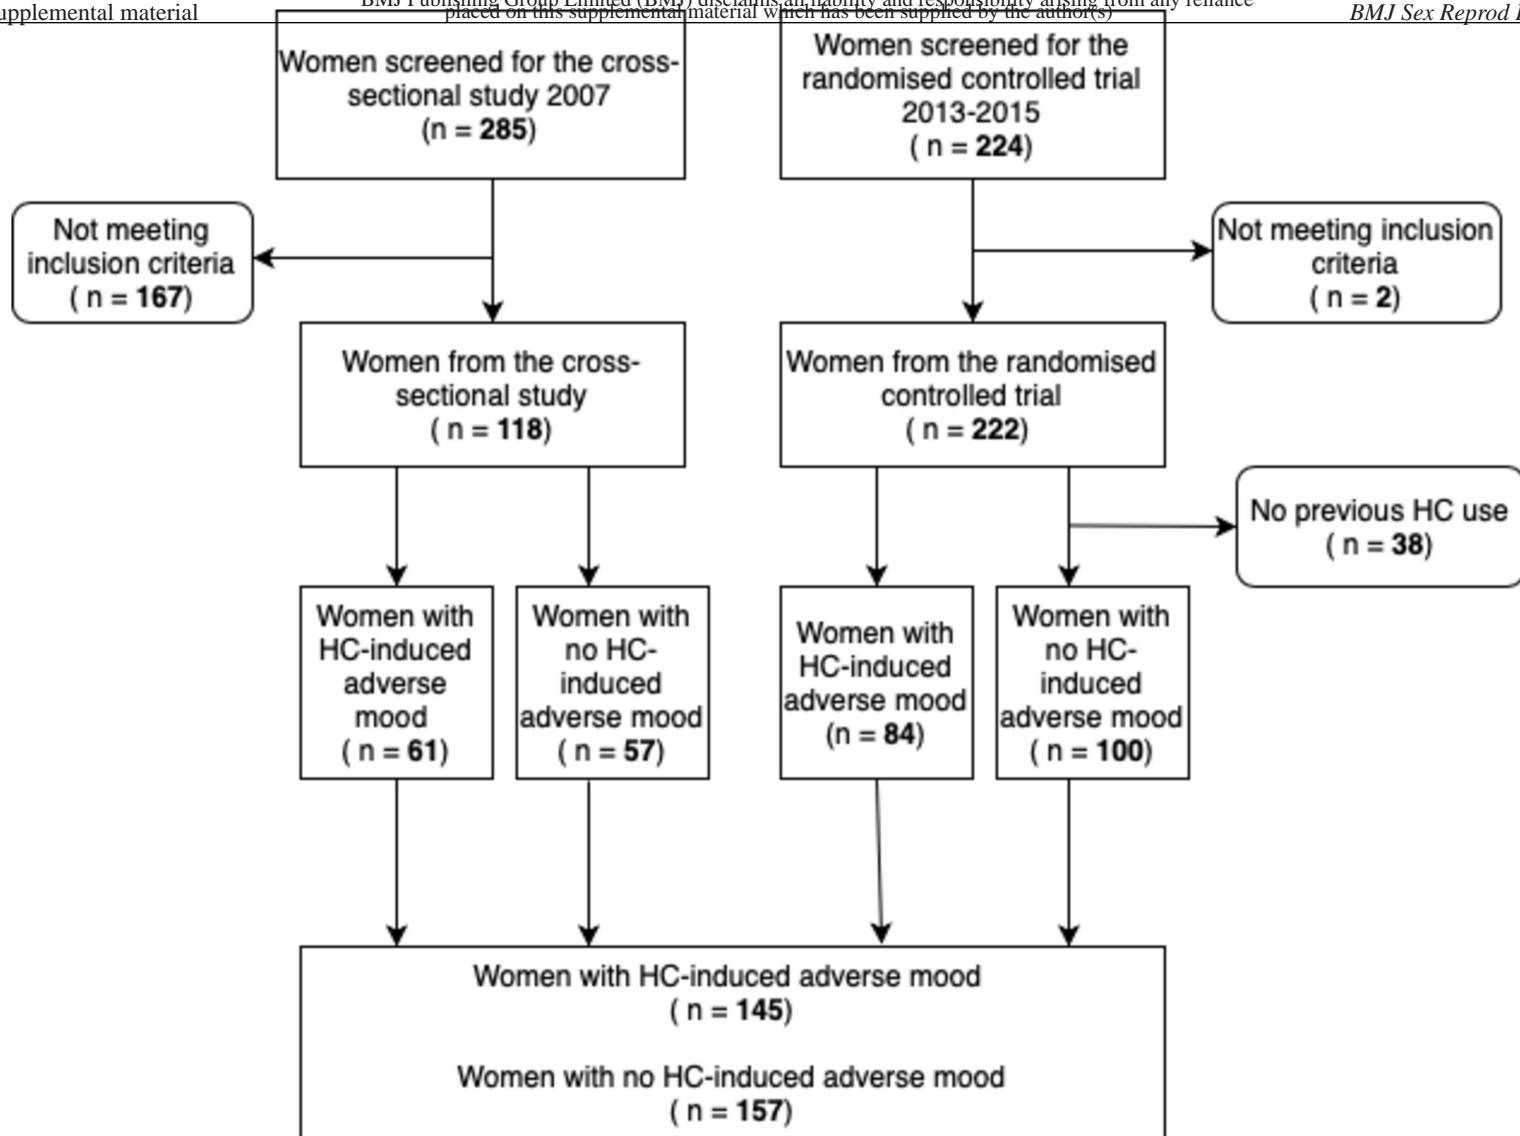

Supplement: inline-supplementary-material-1 [file inline-supplementary-material-1.pdf]
